# Supplementary material
Source: MDPI journal article supplement (https://www.mdpi.com/2073-4441/14/10/1530)
Supplement: s1 [file s1]

Table S1: Results for all ascending individuals, all time intervals, frequentist models (glmm) and Bayesian models (brm)

| all fish         | 1-hour glmm |              |                  | 1-hour brm |               |  | 3-hour glmm |              |                  | 3-hour brm |               | 6-hour glmm |              |                  | 6-hour brm |               | 24-hour glmm |               |                  | 24h-hour brm |               |
|------------------|-------------|--------------|------------------|------------|---------------|--|-------------|--------------|------------------|------------|---------------|-------------|--------------|------------------|------------|---------------|--------------|---------------|------------------|--------------|---------------|
| Predictors       | IRR         | CI           | p                | IRR        | CI (95%)      |  | IRR         | CI (95%)     | p                | IRR        | CI (95%)      | IRR         | CI (95%)     | p                | IRR        | CI (95%)      | IRR          | CI (95%)      | p                | IRR          | CI (95%)      |
| (Intercept)      | 0.36        | 0.09 – 1.39  | 0.137            | 0.29       | 0.03 – 2.39   |  | 0.97        | 0.23 – 4.17  | 0.966            | 0.67       | 0.02 – 6.46   | 1.49        | 0.31 – 7.09  | 0.619            | 1.02       | 0.04 – 10.61  | 30.93        | 3.96 – 241.85 | <b>0.001</b>     | 19.03        | 0.41 – 294.58 |
| Qd               | 0.99        | 0.97 – 1.00  | 0.055            | 0.99       | 0.97 – 1.00   |  | 0.99        | 0.97 – 1.01  | 0.248            | 0.99       | 0.97 – 1.01   | 0.96        | 0.93 – 0.98  | <b>&lt;0.001</b> | 0.96       | 0.93 – 0.98   | 0.85         | 0.80 – 0.91   | <b>&lt;0.001</b> | 0.85         | 0.80 – 0.91   |
| Qf               | 0.94        | 0.90 – 0.98  | <b>0.003</b>     | 0.94       | 0.90 – 0.98   |  | 0.94        | 0.89 – 1.00  | <b>0.05</b>      | 0.94       | 0.89 – 1.00   | 0.99        | 0.92 – 1.07  | 0.788            | 0.99       | 0.92 – 1.06   | 0.93         | 0.80 – 1.09   | 0.371            | 0.92         | 0.79 – 1.08   |
| Qa               | 1           | 0.99 – 1.00  | <b>&lt;0.001</b> | 1          | 0.99 – 1.00   |  | 1           | 0.99 – 1.00  | 0.167            | 1          | 0.99 – 1.00   | 0.99        | 0.98 – 0.99  | <b>0.003</b>     | 0.99       | 0.98 – 1.00   | 0.58         | 0.01 – 26.48  | 0.781            | 0.74         | 0.02 – 40.05  |
| tres             | 1.63        | 1.57 – 1.69  | <b>&lt;0.001</b> | 1.63       | 1.57 – 1.69   |  | 1.64        | 1.57 – 1.73  | <b>&lt;0.001</b> | 1.65       | 1.57 – 1.73   | 1.63        | 1.53 – 1.73  | <b>&lt;0.001</b> | 1.63       | 1.53 – 1.74   | 1.48         | 1.34 – 1.63   | <b>&lt;0.001</b> | 1.49         | 1.35 – 1.65   |
| tdiff            | 2.97        | 2.61 – 3.39  | <b>&lt;0.001</b> | 2.96       | 2.60 – 3.39   |  | 3.15        | 2.61 – 3.80  | <b>&lt;0.001</b> | 3.13       | 2.58 – 3.78   | 2.94        | 2.31 – 3.75  | <b>&lt;0.001</b> | 2.9        | 2.28 – 3.69   | 1.69         | 1.03 – 2.78   | <b>0.04</b>      | 1.65         | 1.01 – 2.66   |
| Site: SB         | 1.89        | 1.61 – 2.23  | <b>&lt;0.001</b> | 1.9        | 1.62 – 2.24   |  | 1.99        | 1.59 – 2.49  | <b>&lt;0.001</b> | 2          | 1.60 – 2.49   | 2.22        | 1.68 – 2.93  | <b>&lt;0.001</b> | 2.22       | 1.67 – 2.95   | 1.8          | 1.12 – 2.89   | <b>0.014</b>     | 1.81         | 1.14 – 2.93   |
| Site: ED         | 3.88        | 0.51 – 29.18 | 0.188            | 4.17       | 0.07 – 218.60 |  | 3.97        | 0.50 – 31.37 | 0.191            | 4.84       | 0.09 – 496.13 | 4.37        | 0.54 – 35.48 | 0.167            | 5.53       | 0.09 – 601.14 | 6.47         | 0.80 – 52.46  | 0.08             | 8.43         | 0.15 – 980.87 |
| sesas.: Spring   | 3.59        | 3.07 – 4.19  | <b>&lt;0.001</b> | 3.59       | 3.09 – 4.21   |  | 3.68        | 2.97 – 4.56  | <b>&lt;0.001</b> | 3.72       | 3.00 – 4.60   | 3.99        | 3.06 – 5.20  | <b>&lt;0.001</b> | 4.05       | 3.10 – 5.29   | 5.12         | 3.38 – 7.77   | <b>&lt;0.001</b> | 5.32         | 3.52 – 8.13   |
| sesas.: Summer   | 1.94        | 1.65 – 2.29  | <b>&lt;0.001</b> | 1.94       | 1.65 – 2.30   |  | 1.91        | 1.52 – 2.40  | <b>&lt;0.001</b> | 1.93       | 1.55 – 2.41   | 2.3         | 1.73 – 3.06  | <b>&lt;0.001</b> | 2.34       | 1.76 – 3.12   | 3.92         | 2.52 – 6.09   | <b>&lt;0.001</b> | 4.02         | 2.58 – 6.32   |
| sesas.: Winter   | 0.04        | 0.01 – 0.09  | <b>&lt;0.001</b> | 0.03       | 0.01 – 0.08   |  | 0.04        | 0.01 – 0.10  | <b>&lt;0.001</b> | 0.04       | 0.01 – 0.10   | 0.04        | 0.01 – 0.12  | <b>&lt;0.001</b> | 0.04       | 0.01 – 0.12   | 0.04         | 0.01 – 0.16   | <b>&lt;0.001</b> | 0.04         | 0.01 – 0.18   |
| <b>Ran. Eff.</b> |             |              |                  |            |               |  |             |              |                  |            |               |             |              |                  |            |               |              |               |                  |              |               |
| SD Intercept     | 1.26        |              |                  | 1.94       |               |  | 1.32        |              |                  | 2.11       |               | 1.34        |              |                  | 2.09       |               | 1.30         |               |                  | 2.11         |               |
| Observations     | 18456       |              |                  | 18456      |               |  | 6157        |              |                  | 6157       |               | 3083        |              |                  | 3083       |               | 775          |               |                  | 775          |               |

Table S2: Results for rheophilic, all time intervals, frequentist models (glmm) and Bayesian models (brm)

| <b>rheophilic</b> | <b>1-hour glmm</b> |             |                  | <b>1-hour brm</b> |                 | <b>3-hour glmm</b> |                 |                  | <b>3-hour brm</b> |                 | <b>6-hour glmm</b> |                 |                  | <b>6-hour brm</b> |                 | <b>24-hour glmm</b> |                 |                  | <b>24h-hour brm</b> |                 |
|-------------------|--------------------|-------------|------------------|-------------------|-----------------|--------------------|-----------------|------------------|-------------------|-----------------|--------------------|-----------------|------------------|-------------------|-----------------|---------------------|-----------------|------------------|---------------------|-----------------|
| <i>Predictors</i> | <i>IRR</i>         | <i>CI</i>   | <i>p</i>         | <i>IRR</i>        | <i>CI (95%)</i> | <i>IRR</i>         | <i>CI (95%)</i> | <i>p</i>         | <i>IRR</i>        | <i>CI (95%)</i> | <i>IRR</i>         | <i>CI (95%)</i> | <i>p</i>         | <i>IRR</i>        | <i>CI (95%)</i> | <i>IRR</i>          | <i>CI (95%)</i> | <i>p</i>         | <i>IRR</i>          | <i>CI (95%)</i> |
| (Intercept)       | 0.39               | 0.10 – 1.62 | 0.195            | 0.4               | 0.04 – 3.53     | 0.96               | 0.21 – 4.44     | 0.958            | 0.83              | 0.07 – 7.31     | 1.18               | 0.21 – 6.60     | 0.852            | 0.91              | 0.07 – 9.54     | 20.5                | 1.66 – 253.38   | <b>0.019</b>     | 14.07               | 0.46 – 282.11   |
| Qd                | 0.95               | 0.93 – 0.97 | <b>&lt;0.001</b> | 0.95              | 0.93 – 0.97     | 0.95               | 0.92 – 0.97     | <b>&lt;0.001</b> | 0.95              | 0.92 – 0.98     | 0.92               | 0.88 – 0.95     | <b>&lt;0.001</b> | 0.92              | 0.88 – 0.95     | 0.82                | 0.76 – 0.89     | <b>&lt;0.001</b> | 0.82                | 0.76 – 0.89     |
| Qf                | 0.97               | 0.91 – 1.04 | 0.424            | 0.97              | 0.91 – 1.04     | 0.99               | 0.90 – 1.08     | 0.746            | 0.98              | 0.90 – 1.08     | 1.05               | 0.94 – 1.17     | 0.411            | 1.05              | 0.93 – 1.18     | 1                   | 0.81 – 1.23     | 0.979            | 0.99                | 0.80 – 1.22     |
| Qa                | 0.98               | 0.97 – 0.98 | <b>&lt;0.001</b> | 0.98              | 0.97 – 0.98     | 0.97               | 0.96 – 0.98     | <b>&lt;0.001</b> | 0.97              | 0.95 – 0.98     | 0.95               | 0.94 – 0.97     | <b>&lt;0.001</b> | 0.95              | 0.93 – 0.97     | 0.99                | 0.01 – 68.33    | 0.996            | 1.17                | 0.02 – 105.47   |
| tres              | 1.38               | 1.29 – 1.47 | <b>&lt;0.001</b> | 1.39              | 1.30 – 1.48     | 1.39               | 1.29 – 1.51     | <b>&lt;0.001</b> | 1.4               | 1.30 – 1.51     | 1.37               | 1.25 – 1.50     | <b>&lt;0.001</b> | 1.38              | 1.26 – 1.51     | 1.2                 | 1.06 – 1.37     | <b>0.005</b>     | 1.22                | 1.07 – 1.39     |
| tdiff             | 1.4                | 1.15 – 1.70 | <b>0.001</b>     | 1.39              | 1.14 – 1.69     | 1.36               | 1.06 – 1.75     | <b>0.015</b>     | 1.35              | 1.06 – 1.76     | 1.15               | 0.85 – 1.55     | 0.354            | 1.15              | 0.85 – 1.55     | 0.79                | 0.46 – 1.33     | 0.37             | 0.81                | 0.48 – 1.34     |
| Site: SB          | 0.71               | 0.53 – 0.95 | <b>0.02</b>      | 0.71              | 0.53 – 0.96     | 0.76               | 0.53 – 1.08     | 0.126            | 0.76              | 0.53 – 1.10     | 0.84               | 0.55 – 1.28     | 0.417            | 0.85              | 0.56 – 1.32     | 0.69                | 0.36 – 1.30     | 0.245            | 0.71                | 0.37 – 1.35     |
| Site: ED          | 0.89               | 0.14 – 5.49 | 0.9              | 0.85              | 0.02 – 30.92    | 1.01               | 0.17 – 5.98     | 0.991            | 1.09              | 0.03 – 39.93    | 1.29               | 0.22 – 7.46     | 0.78             | 1.44              | 0.05 – 56.02    | 1.77                | 0.36 – 8.57     | 0.481            | 1.98                | 0.08 – 95.39    |
| sesas.: Spring    | 2.85               | 2.24 – 3.63 | <b>&lt;0.001</b> | 2.9               | 2.29 – 3.70     | 2.94               | 2.18 – 3.95     | <b>&lt;0.001</b> | 2.99              | 2.24 – 4.03     | 3.34               | 2.39 – 4.67     | <b>&lt;0.001</b> | 3.44              | 2.45 – 4.83     | 3.35                | 2.17 – 5.17     | <b>&lt;0.001</b> | 3.53                | 2.28 – 5.52     |
| sesas.: Summer    | 0.65               | 0.50 – 0.83 | <b>0.001</b>     | 0.65              | 0.51 – 0.83     | 0.67               | 0.49 – 0.91     | <b>0.012</b>     | 0.68              | 0.49 – 0.93     | 0.83               | 0.58 – 1.20     | 0.323            | 0.85              | 0.59 – 1.23     | 1.12                | 0.70 – 1.79     | 0.644            | 1.16                | 0.72 – 1.89     |
| sesas.: Winter    | 0.08               | 0.03 – 0.23 | <b>&lt;0.001</b> | 0.08              | 0.03 – 0.22     | 0.08               | 0.03 – 0.25     | <b>&lt;0.001</b> | 0.08              | 0.02 – 0.25     | 0.08               | 0.02 – 0.27     | <b>&lt;0.001</b> | 0.08              | 0.02 – 0.30     | 0.06                | 0.01 – 0.27     | <b>&lt;0.001</b> | 0.07                | 0.01 – 0.38     |
| <b>Ran. Eff.</b>  |                    |             |                  |                   |                 |                    |                 |                  |                   |                 |                    |                 |                  |                   |                 |                     |                 |                  |                     |                 |
| SD Intercept      | 1.01               |             |                  | 1.82              |                 | 0.95               |                 |                  | 1.77              |                 | 0.91               |                 |                  | 1.75              |                 | 0.67                |                 |                  | 1.66                |                 |
| Observations      | 18456              |             |                  | 18456             |                 | 6157               |                 |                  | 6157              |                 | 3083               |                 |                  | 3083              |                 | 775                 |                 |                  | 775                 |                 |

Table S3: Results for eurytopic w/o Bream, all time intervals, frequentist models (glmm) and Bayesian models (brm)

| eurytop. w/o Bleak | 1-hour glmm |              |              | 1-hour brm |               | 3-hour glmm |              |              | 3-hour brm |               | 6-hour glmm |              |              | 6-hour brm |               | 24-hour glmm |              |              | 24h-hour brm |               |
|--------------------|-------------|--------------|--------------|------------|---------------|-------------|--------------|--------------|------------|---------------|-------------|--------------|--------------|------------|---------------|--------------|--------------|--------------|--------------|---------------|
| Predictors         | IRR         | CI           | p            | IRR        | CI (95%)      | IRR         | CI (95%)     | p            | IRR        | CI (95%)      | IRR         | CI (95%)     | p            | IRR        | CI (95%)      | IRR          | CI (95%)     | p            | IRR          | CI (95%)      |
| (Intercept)        | 0.09        | 0.03 – 0.30  | <0.001       | 0.08       | 0.01 – 0.70   | 0.24        | 0.06 – 0.94  | <b>0.04</b>  | 0.22       | 0.03 – 1.75   | 0.45        | 0.11 – 1.91  | 0.28         | 0.36       | 0.03 – 3.00   | 5.71         | 0.88 – 36.85 | 0.067        | 4.07         | 0.19 – 53.07  |
| Qd                 | 0.98        | 0.97 – 1.00  | <b>0.026</b> | 0.98       | 0.97 – 1.00   | 0.98        | 0.96 – 1.00  | 0.075        | 0.98       | 0.97 – 1.00   | 0.97        | 0.95 – 1.00  | <b>0.021</b> | 0.97       | 0.95 – 1.00   | 0.85         | 0.80 – 0.90  | <0.001       | 0.85         | 0.80 – 0.90   |
| Qf                 | 0.91        | 0.87 – 0.95  | <0.001       | 0.91       | 0.87 – 0.95   | 0.91        | 0.86 – 0.96  | <b>0.001</b> | 0.91       | 0.86 – 0.96   | 0.92        | 0.86 – 0.99  | <b>0.018</b> | 0.92       | 0.86 – 0.99   | 0.98         | 0.85 – 1.12  | 0.72         | 0.97         | 0.85 – 1.11   |
| Qa                 | 1           | 1.00 – 1.00  | <b>0.043</b> | 1          | 1.00 – 1.00   | 1           | 0.99 – 1.00  | 0.131        | 1          | 0.99 – 1.00   | 1           | 0.99 – 1.01  | 0.628        | 1          | 0.99 – 1.01   | 0.02         | 0.00 – 0.69  | <b>0.03</b>  | 0.02         | 0.00 – 0.86   |
| tres               | 1.82        | 1.75 – 1.89  | <0.001       | 1.82       | 1.75 – 1.90   | 1.82        | 1.73 – 1.92  | <0.001       | 1.83       | 1.74 – 1.92   | 1.82        | 1.71 – 1.93  | <0.001       | 1.82       | 1.72 – 1.93   | 1.77         | 1.63 – 1.92  | <0.001       | 1.78         | 1.64 – 1.93   |
| tdiff              | 2.49        | 2.19 – 2.84  | <0.001       | 2.48       | 2.19 – 2.84   | 2.7         | 2.24 – 3.25  | <0.001       | 2.68       | 2.23 – 3.21   | 2.79        | 2.19 – 3.56  | <0.001       | 2.75       | 2.17 – 3.53   | 2.3          | 1.47 – 3.59  | <0.001       | 2.23         | 1.41 – 3.45   |
| Site: SB           | 1.43        | 1.19 – 1.71  | <0.001       | 1.43       | 1.19 – 1.70   | 1.4         | 1.10 – 1.77  | <b>0.006</b> | 1.4        | 1.10 – 1.78   | 1.43        | 1.07 – 1.90  | <b>0.016</b> | 1.43       | 1.07 – 1.91   | 1.49         | 0.94 – 2.34  | 0.088        | 1.49         | 0.94 – 2.35   |
| Site: ED           | 9.12        | 1.48 – 56.12 | <b>0.017</b> | 9.47       | 0.28 – 451.87 | 8.44        | 1.28 – 55.82 | <b>0.027</b> | 8.97       | 0.19 – 352.85 | 8.53        | 1.25 – 58.18 | <b>0.029</b> | 9.47       | 0.23 – 560.58 | 10.72        | 1.58 – 72.60 | <b>0.015</b> | 13.06        | 0.31 – 811.15 |
| sesas.: Spring     | 1.88        | 1.63 – 2.17  | <0.001       | 1.89       | 1.64 – 2.18   | 2.13        | 1.76 – 2.59  | <0.001       | 2.14       | 1.76 – 2.62   | 2.31        | 1.82 – 2.93  | <0.001       | 2.33       | 1.82 – 2.95   | 2.97         | 2.08 – 4.23  | <0.001       | 3.03         | 2.12 – 4.33   |
| sesas.: Summer     | 1.77        | 1.49 – 2.10  | <0.001       | 1.77       | 1.49 – 2.10   | 1.86        | 1.48 – 2.33  | <0.001       | 1.86       | 1.48 – 2.36   | 2.01        | 1.52 – 2.64  | <0.001       | 2.01       | 1.53 – 2.66   | 3.29         | 2.18 – 4.96  | <0.001       | 3.34         | 2.21 – 5.05   |
| sesas.: Winter     | 0.03        | 0.00 – 0.21  | <0.001       | 0.02       | 0.00 – 0.11   | 0.03        | 0.00 – 0.23  | <b>0.001</b> | 0.02       | 0.00 – 0.13   | 0.03        | 0.00 – 0.23  | <b>0.001</b> | 0.02       | 0.00 – 0.14   | 0.03         | 0.00 – 0.28  | <b>0.002</b> | 0.02         | 0.00 – 0.19   |
| <b>Ran. Eff.</b>   |             |              |              |            |               |             |              |              |            |               |             |              |              |            |               |              |              |              |              |               |
| SD Intercept       | 1.02        |              |              | 1.8        |               | 1.10        |              |              | 1.83       |               | 1.13        |              |              | 1.87       |               | 1.09         |              |              | 1.9          |               |
| Observations       | 18456       |              |              | 18456      |               | 6157        |              |              | 6157       |               | 3083        |              |              | 3083       |               | 775          |              |              | 775          |               |

Table S4: Results for salmonidae, all time intervals, frequentist models (glmm) and Bayesian models (brm)

| salmonidae       | 1-hour glmm |             |        | 1-hour brm |              | 3-hour glmm |              |        | 3-hour brm |              | 6-hour glmm |              |        | 6-hour brm |              | 24-hour glmm |             |        | 24h-hour brm |             |
|------------------|-------------|-------------|--------|------------|--------------|-------------|--------------|--------|------------|--------------|-------------|--------------|--------|------------|--------------|--------------|-------------|--------|--------------|-------------|
| Predictors       | IRR         | CI          | p      | IRR        | CI (95%)     | IRR         | CI (95%)     | p      | IRR        | CI (95%)     | IRR         | CI (95%)     | p      | IRR        | CI (95%)     | IRR          | CI (95%)    | p      | IRR          | CI (95%)    |
| (Intercept)      | 0           | 0.00 – 0.01 | <0.001 | 0          | 0.00 – 0.02  | 0.01        | 0.00 – 0.03  | <0.001 | 0.01       | 0.00 – 0.05  | 0.02        | 0.01 – 0.07  | <0.001 | 0.02       | 0.00 – 0.10  | 1.36         | 0.24 – 7.84 | 0.727  | 1.25         | 0.15 – 9.82 |
| Qd               | 0.99        | 0.97 – 1.02 | 0.577  | 0.99       | 0.97 – 1.02  | 0.99        | 0.96 – 1.02  | 0.432  | 0.99       | 0.96 – 1.02  | 1           | 0.97 – 1.03  | 0.943  | 1          | 0.97 – 1.03  | 0.84         | 0.77 – 0.92 | <0.001 | 0.84         | 0.77 – 0.92 |
| Qf               | 1.08        | 1.00 – 1.17 | 0.059  | 1.08       | 1.00 – 1.17  | 1.08        | 0.99 – 1.18  | 0.066  | 1.08       | 1.00 – 1.18  | 1.07        | 0.97 – 1.18  | 0.201  | 1.07       | 0.97 – 1.19  | 1.04         | 0.88 – 1.22 | 0.656  | 1.04         | 0.88 – 1.22 |
| Qa               | 0.98        | 0.97 – 0.99 | <0.001 | 0.98       | 0.97 – 0.99  | 0.95        | 0.92 – 0.98  | 0.003  | 0.95       | 0.90 – 0.97  | 0.96        | 0.92 – 0.99  | 0.023  | 0.95       | 0.90 – 0.98  | 0            | 0.00 – 0.10 | 0.002  | 0            | 0.00 – 0.12 |
| tres             | 1.31        | 1.21 – 1.43 | <0.001 | 1.31       | 1.21 – 1.43  | 1.32        | 1.21 – 1.44  | <0.001 | 1.32       | 1.21 – 1.44  | 1.33        | 1.22 – 1.46  | <0.001 | 1.33       | 1.21 – 1.47  | 1.33         | 1.20 – 1.48 | <0.001 | 1.33         | 1.19 – 1.48 |
| tdiff            | 0.87        | 0.61 – 1.25 | 0.465  | 0.86       | 0.59 – 1.23  | 0.97        | 0.66 – 1.42  | 0.878  | 0.95       | 0.65 – 1.40  | 1.09        | 0.71 – 1.66  | 0.692  | 1.06       | 0.71 – 1.61  | 1.46         | 0.72 – 2.97 | 0.299  | 1.35         | 0.68 – 2.68 |
| Site: SB         | 6.8         | 4.71 – 9.81 | <0.001 | 6.67       | 4.68 – 9.79  | 6.95        | 4.74 – 10.17 | <0.001 | 6.87       | 4.66 – 10.17 | 6.77        | 4.45 – 10.30 | <0.001 | 6.68       | 4.40 – 10.40 | 4.88         | 2.90 – 8.20 | <0.001 | 4.79         | 2.79 – 8.22 |
| Site: ED         | 1.26        | 0.53 – 3.02 | 0.602  | 1.23       | 0.12 – 11.05 | 1.22        | 0.52 – 2.90  | 0.647  | 1.18       | 0.14 – 7.71  | 1.14        | 0.49 – 2.66  | 0.768  | 1.1        | 0.14 – 9.40  | 0.97         | 0.43 – 2.21 | 0.946  | 1            | 0.15 – 7.08 |
| sesas.: Spring   | 1.09        | 0.79 – 1.51 | 0.606  | 1.05       | 0.75 – 1.49  | 1.1         | 0.79 – 1.55  | 0.567  | 1.06       | 0.74 – 1.51  | 1.11        | 0.77 – 1.60  | 0.564  | 1.07       | 0.73 – 1.55  | 1.3          | 0.88 – 1.90 | 0.185  | 1.23         | 0.81 – 1.85 |
| sesas.: Summer   | 1.55        | 1.12 – 2.15 | 0.008  | 1.52       | 1.09 – 2.13  | 1.58        | 1.12 – 2.21  | 0.008  | 1.54       | 1.09 – 2.19  | 1.54        | 1.07 – 2.22  | 0.02   | 1.51       | 1.03 – 2.17  | 2.26         | 1.46 – 3.49 | <0.001 | 2.17         | 1.39 – 3.42 |
| sesas.: Winter   | 0.29        | 0.07 – 1.25 | 0.096  | 0.25       | 0.04 – 0.92  | 0.3         | 0.07 – 1.34  | 0.116  | 0.26       | 0.04 – 0.98  | 0.3         | 0.06 – 1.41  | 0.128  | 0.26       | 0.03 – 1.06  | 0.27         | 0.05 – 1.36 | 0.113  | 0.24         | 0.03 – 1.11 |
| <b>Ran. Eff.</b> |             |             |        |            |              |             |              |        |            |              |             |              |        |            |              |              |             |        |              |             |
| SD Intercept     | 0.17        |             |        | 0.99       |              | 0.16        |              |        | 0.95       |              | 0.14        |              |        | 0.95       |              | 0.08         |             |        | 0.83         |             |
| Observations     | 18456       |             |        | 18456      |              | 6157        |              |        | 6157       |              | 3083        |              |        | 3083       |              | 775          |             |        | 775          |             |

Table S5: Results for cyprinidae w/o Bream, all time intervals, frequentist models (glmm) and Bayesian models (brm)

| cyprinidae w/o Bleak | 1-hour glmm |              |        | 1-hour brm |              |  | 3-hour glmm |              |        | 3-hour brm |               |  | 6-hour glmm |              |        | 6-hour brm |               |  | 24-hour glmm |              |        | 24h-hour brm |               |
|----------------------|-------------|--------------|--------|------------|--------------|--|-------------|--------------|--------|------------|---------------|--|-------------|--------------|--------|------------|---------------|--|--------------|--------------|--------|--------------|---------------|
| Predictors           | IRR         | CI           | p      | IRR        | CI (95%)     |  | IRR         | CI (95%)     | p      | IRR        | CI (95%)      |  | IRR         | CI (95%)     | p      | IRR        | CI (95%)      |  | IRR          | CI (95%)     | p      | IRR          | CI (95%)      |
| (Intercept)          | 0.36        | 0.11 – 1.17  | 0.09   | 0.31       | 0.04 – 2.03  |  | 0.77        | 0.20 – 2.93  | 0.701  | 0.62       | 0.06 – 4.56   |  | 0.86        | 0.19 – 3.94  | 0.85   | 0.65       | 0.05 – 5.94   |  | 5.06         | 0.52 – 48.91 | 0.162  | 3.32         | 0.10 – 54.58  |
| Qd                   | 0.96        | 0.94 – 0.98  | <0.001 | 0.96       | 0.94 – 0.98  |  | 0.96        | 0.93 – 0.98  | <0.001 | 0.96       | 0.93 – 0.98   |  | 0.92        | 0.89 – 0.95  | <0.001 | 0.92       | 0.89 – 0.95   |  | 0.82         | 0.76 – 0.89  | <0.001 | 0.83         | 0.77 – 0.90   |
| Qf                   | 0.95        | 0.90 – 1.00  | 0.06   | 0.95       | 0.90 – 1.00  |  | 0.97        | 0.91 – 1.05  | 0.482  | 0.97       | 0.90 – 1.05   |  | 1.05        | 0.96 – 1.15  | 0.31   | 1.05       | 0.95 – 1.15   |  | 1.1          | 0.91 – 1.33  | 0.318  | 1.09         | 0.90 – 1.32   |
| Qa                   | 0.99        | 0.99 – 0.99  | <0.001 | 0.99       | 0.99 – 0.99  |  | 0.99        | 0.99 – 1.00  | <0.001 | 0.99       | 0.99 – 1.00   |  | 0.98        | 0.97 – 0.99  | <0.001 | 0.98       | 0.97 – 0.99   |  | 0.76         | 0.01 – 51.62 | 0.899  | 1.07         | 0.02 – 93.30  |
| tres                 | 1.47        | 1.41 – 1.54  | <0.001 | 1.48       | 1.41 – 1.54  |  | 1.5         | 1.41 – 1.59  | <0.001 | 1.5        | 1.41 – 1.60   |  | 1.47        | 1.37 – 1.59  | <0.001 | 1.48       | 1.38 – 1.59   |  | 1.33         | 1.19 – 1.48  | <0.001 | 1.34         | 1.20 – 1.51   |
| tdiff                | 1.53        | 1.32 – 1.78  | <0.001 | 1.53       | 1.32 – 1.77  |  | 1.48        | 1.21 – 1.82  | <0.001 | 1.48       | 1.20 – 1.82   |  | 1.22        | 0.94 – 1.58  | 0.131  | 1.22       | 0.95 – 1.59   |  | 0.66         | 0.40 – 1.08  | 0.095  | 0.68         | 0.42 – 1.11   |
| Site: SB             | 0.67        | 0.54 – 0.84  | <0.001 | 0.68       | 0.54 – 0.85  |  | 0.75        | 0.55 – 1.00  | 0.054  | 0.75       | 0.55 – 1.02   |  | 0.85        | 0.59 – 1.23  | 0.391  | 0.87       | 0.60 – 1.25   |  | 0.87         | 0.49 – 1.54  | 0.63   | 0.9          | 0.51 – 1.60   |
| Site: ED             | 3.02        | 0.61 – 15.04 | 0.178  | 3.33       | 0.17 – 85.38 |  | 3.56        | 0.69 – 18.39 | 0.13   | 3.96       | 0.18 – 129.26 |  | 4.59        | 0.86 – 24.58 | 0.075  | 5.2        | 0.16 – 232.13 |  | 7.96         | 1.51 – 41.97 | 0.014  | 9.5          | 0.30 – 560.82 |
| sesas.: Spring       | 3.74        | 3.13 – 4.46  | <0.001 | 3.78       | 3.16 – 4.49  |  | 3.96        | 3.11 – 5.04  | <0.001 | 4.03       | 3.17 – 5.08   |  | 4.65        | 3.48 – 6.23  | <0.001 | 4.76       | 3.52 – 6.35   |  | 5.23         | 3.45 – 7.90  | <0.001 | 5.5          | 3.65 – 8.39   |
| sesas.: Summer       | 0.87        | 0.72 – 1.07  | 0.184  | 0.88       | 0.72 – 1.07  |  | 0.87        | 0.66 – 1.14  | 0.307  | 0.88       | 0.68 – 1.15   |  | 1.1         | 0.79 – 1.52  | 0.58   | 1.11       | 0.80 – 1.55   |  | 1.47         | 0.92 – 2.33  | 0.103  | 1.51         | 0.96 – 2.46   |
| sesas.: Winter       | 0.04        | 0.01 – 0.14  | <0.001 | 0.04       | 0.01 – 0.11  |  | 0.04        | 0.01 – 0.15  | <0.001 | 0.04       | 0.01 – 0.12   |  | 0.04        | 0.01 – 0.16  | <0.001 | 0.04       | 0.01 – 0.14   |  | 0.03         | 0.01 – 0.17  | <0.001 | 0.03         | 0.01 – 0.19   |
| <b>Ran. Eff.</b>     |             |              |        |            |              |  |             |              |        |            |               |  |             |              |        |            |               |  |              |              |        |              |               |
| SD Intercept         | 0.79        |              |        | 1.63       |              |  | 0.82        |              |        | 1.62       |               |  | 0.84        |              |        | 1.73       |               |  | 0.77         |              |        | 1.75         |               |
| Observations         | 18456       |              |        | 18456      |              |  | 6157        |              |        | 6157       |               |  | 3083        |              |        | 3083       |               |  | 775          |              |        | 775          |               |

Table S6: Results for cyptinidae w/o Bream, all time intervals, frequentist models (glmm) and Bayesian models (brm)

| percidae         | 1-hour glmm |              |                  | 1-hour brm |               | 3-hour glmm |              |                  | 3-hour brm |               | 6-hour glmm |              |                  | 6-hour brm |               | 24-hour glmm |              |                  | 24h-hour brm |               |
|------------------|-------------|--------------|------------------|------------|---------------|-------------|--------------|------------------|------------|---------------|-------------|--------------|------------------|------------|---------------|--------------|--------------|------------------|--------------|---------------|
| Predictors       | IRR         | CI           | p                | IRR        | CI (95%)      | IRR         | CI (95%)     | p                | IRR        | CI (95%)      | IRR         | CI (95%)     | p                | IRR        | CI (95%)      | IRR          | CI (95%)     | p                | IRR          | CI (95%)      |
| (Intercept)      | 0.05        | 0.01 – 0.31  | <b>0.001</b>     | 0.08       | 0.01 – 3.25   | 0.15        | 0.02 – 0.95  | <b>0.045</b>     | 0.2        | 0.01 – 5.60   | 0.22        | 0.03 – 1.61  | 0.136            | 0.3        | 0.02 – 10.06  | 4.6          | 0.38 – 55.15 | 0.229            | 5.35         | 0.21 – 195.26 |
| Qd               | 1.01        | 0.99 – 1.04  | 0.165            | 1.01       | 0.99 – 1.03   | 1.02        | 0.99 – 1.04  | 0.267            | 1.02       | 0.99 – 1.04   | 1.01        | 0.98 – 1.04  | 0.569            | 1.01       | 0.98 – 1.05   | 0.9          | 0.83 – 0.97  | <b>0.008</b>     | 0.9          | 0.84 – 0.98   |
| Qf               | 0.88        | 0.83 – 0.93  | <b>&lt;0.001</b> | 0.87       | 0.82 – 0.93   | 0.88        | 0.81 – 0.95  | <b>0.001</b>     | 0.87       | 0.81 – 0.94   | 0.9         | 0.81 – 0.99  | <b>0.023</b>     | 0.89       | 0.81 – 0.98   | 0.87         | 0.74 – 1.04  | 0.128            | 0.87         | 0.73 – 1.04   |
| Qa               | 1           | 0.99 – 1.00  | <b>0.044</b>     | 1          | 0.99 – 1.00   | 0.99        | 0.98 – 1.00  | <b>0.02</b>      | 0.99       | 0.98 – 1.00   | 1           | 0.99 – 1.01  | 0.841            | 1          | 0.99 – 1.01   | 0.08         | 0.00 – 4.84  | 0.226            | 0.08         | 0.00 – 6.34   |
| tres             | 2.19        | 2.04 – 2.35  | <b>&lt;0.001</b> | 2.2        | 2.05 – 2.37   | 2.26        | 2.07 – 2.47  | <b>&lt;0.001</b> | 2.27       | 2.08 – 2.47   | 2.25        | 2.03 – 2.48  | <b>&lt;0.001</b> | 2.26       | 2.05 – 2.50   | 2.12         | 1.88 – 2.39  | <b>&lt;0.001</b> | 2.13         | 1.89 – 2.42   |
| tdiff            | 2.58        | 2.13 – 3.13  | <b>&lt;0.001</b> | 2.57       | 2.12 – 3.12   | 2.72        | 2.08 – 3.56  | <b>&lt;0.001</b> | 2.69       | 2.07 – 3.57   | 2.75        | 1.97 – 3.84  | <b>&lt;0.001</b> | 2.7        | 1.95 – 3.76   | 3.61         | 1.87 – 6.95  | <b>&lt;0.001</b> | 3.2          | 1.71 – 5.99   |
| Site: SB         | 1.56        | 1.21 – 2.02  | <b>0.001</b>     | 1.56       | 1.20 – 2.04   | 1.65        | 1.19 – 2.29  | <b>0.003</b>     | 1.65       | 1.19 – 2.27   | 1.83        | 1.24 – 2.72  | <b>0.002</b>     | 1.83       | 1.24 – 2.72   | 1.67         | 0.94 – 2.97  | 0.079            | 1.66         | 0.93 – 3.02   |
| Site: ED         | 5.27        | 0.41 – 68.27 | 0.204            | 4.54       | 0.03 – 379.17 | 5.37        | 0.40 – 72.77 | 0.206            | 4.84       | 0.04 – 474.46 | 5.8         | 0.43 – 78.93 | 0.187            | 4.89       | 0.03 – 446.67 | 4.95         | 0.38 – 65.04 | 0.224            | 4.77         | 0.04 – 507.87 |
| sesas.: Spring   | 0.39        | 0.32 – 0.49  | <b>&lt;0.001</b> | 0.39       | 0.32 – 0.49   | 0.39        | 0.29 – 0.52  | <b>&lt;0.001</b> | 0.39       | 0.30 – 0.53   | 0.41        | 0.29 – 0.58  | <b>&lt;0.001</b> | 0.41       | 0.30 – 0.58   | 0.55         | 0.35 – 0.88  | <b>0.012</b>     | 0.56         | 0.35 – 0.88   |
| sesas.: Summer   | 1.5         | 1.18 – 1.91  | <b>0.001</b>     | 1.51       | 1.19 – 1.93   | 1.73        | 1.27 – 2.35  | <b>0.001</b>     | 1.74       | 1.28 – 2.36   | 1.85        | 1.29 – 2.66  | <b>0.001</b>     | 1.87       | 1.31 – 2.70   | 2.76         | 1.71 – 4.47  | <b>&lt;0.001</b> | 2.79         | 1.72 – 4.53   |
| sesas.: Winter   | 0           | 0.00 – Inf   | 0.988            | 0          | 0.00 – 0.00   | 0           | 0.00 – Inf   | 0.991            | 0          | 0.00 – 0.00   | 0           | 0.00 – Inf   | 0.992            | 0          | 0.00 – 0.00   | 0            | 0.00 – Inf   | 0.995            | 0            | 0.00 – 0.00   |
| <b>Ran. Eff.</b> |             |              |                  |            |               |             |              |                  |            |               |             |              |                  |            |               |              |              |                  |              |               |
| SD Intercept     | 2.02        |              |                  | 2.42       |               | 2.07        |              |                  | 2.38       |               | 2.06        |              |                  | 2.38       |               | 1.95         |              |                  | 2.33         |               |
| Observations     | 18456       |              |                  | 18456      |               | 6157        |              |                  | 6157       |               | 3083        |              |                  | 3083       |               | 775          |              |                  | 775          |               |
